# Supplementary material
Source: HighWire-hosted journal article supplement (http://www.jrheum.org/highwire/filestream/29735/field_highwire_adjunct_files/0/140977_Data_Suppl.pdf)
Supplement: 140977_Data_Suppl.pdf [file 140977_Data_Suppl.pdf]

**Supplementary Table.** Therapies used until second sampling point.

|        | Type of ILD | Outcome  | Treatment               |                  |                          |                  |               |              |
|--------|-------------|----------|-------------------------|------------------|--------------------------|------------------|---------------|--------------|
|        |             |          | mPSL <sup>a</sup>       | PSL <sup>b</sup> | IVCY                     | CSA <sup>b</sup> | IVIG          | Other        |
| Case 1 | RP-ILD      | Death    | 30 mg/kg for 3 days x3  | 1.5 mg/kg/day    | 500 mg/m <sup>2</sup> x3 | 5.5 mg/kg/day    | 2 g/kg x3 etc |              |
| Case 2 | RP-ILD      | Death    | 30 mg/kg for 3 days x1  | 2.2 mg/kg/day    | 500 mg/m <sup>2</sup> x2 | 1.0 mg/kg/day    | 230 mg/kg x4  |              |
| Case 3 | RP-ILD      | Death    | 30 mg/kg for 3 days x 2 | 1.6 mg/kg/day    | 540 mg/m <sup>2</sup> x1 | 2.3 mg/kg/day    | ND            | Azathioprine |
| Case 4 | RP-ILD      | Recovery | 30 mg/kg for 3 days x1  | 2.0 mg/kg/day    | ND                       | 3.7 mg/kg/day    | ND            |              |
| Case 5 | RP-ILD      | Recovery | 30 mg/kg for 3 days x1  | 1.5 mg/kg/day    | ND                       | 6.5 mg/kg/day    | 200 mg/kg x5  |              |
| Case 6 | C-ILD       | Recovery | 20 mg/kg for 3 days x1  | 1.2 mg/kg/day    | ND                       | 4.0 mg/kg/day    | ND            |              |
| Case 7 | C-ILD       | Recovery | 15 mg/kg for 3 days x1  | 1.84 mg/kg/day   | ND                       | 6.0 mg/kg/day    | ND            |              |
| Case 8 | C-ILD       | Recovery | ND                      | 2.0 mg/kg/day    | ND                       | ND               | ND            | Tacrolimus   |

<sup>a</sup>This dose was for 1 day to up to 3 days; <sup>b</sup>Maximum dose. ILD: interstitial lung disease; RP: rapidly progressive; C-ILD: chronic ILD; mPSL: methylprednisolone pulse therapy; PSL: prednisolone; IVCY: intravenous cyclophosphamide; CSA: cyclosporine; IVIG: intravenous immunoglobulin therapy; ND: not done.

Supplementary Figure

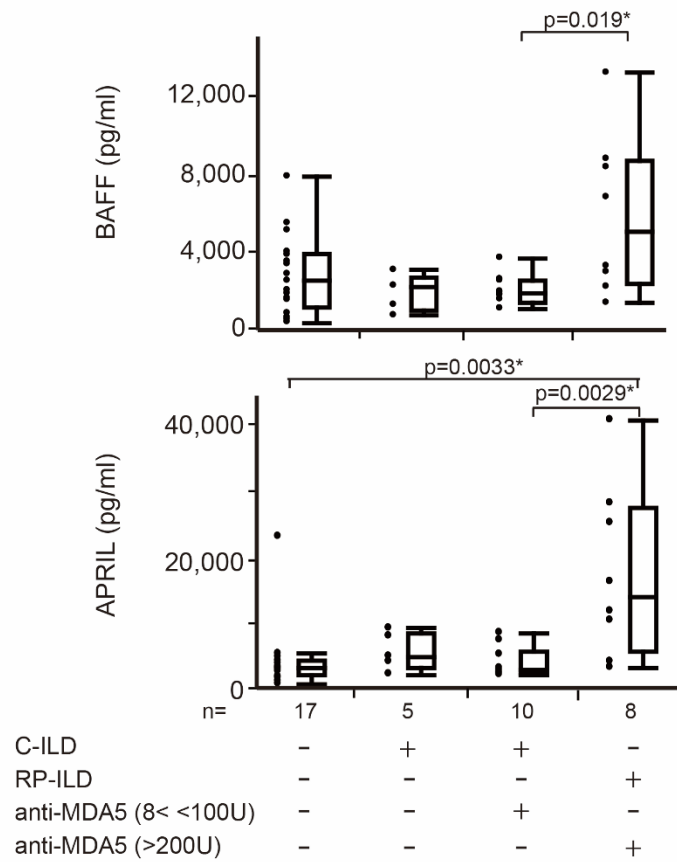

Online supplement to Increased Serum B Cell Activating Factor and a Proliferation-inducing Ligand Are Associated with Interstitial Lung Disease in Patients with Juvenile Dermatomyositis, *The Journal of Rheumatology*, doi:10.3899/jrheum.140977.

**Supplementary Figure Legend. The relationship of BAFF and APRIL to anti-MDA5 and ILD forms.** Serum BAFF and APRIL levels in C-ILD with anti-MDA5, C-ILD with low levels of anti-MDA5 (< 100 U) and RP-ILD with high levels of anti-MDA5 (> 200 U). The horizontal line within boxes represents the median, the upper and lower boundaries of the boxes represent the 75th and 25th percentiles, respectively, and the top and bottom whiskers represent the 95th and 5th percentiles, respectively. Dots represent individual patient cytokine values. Displayed p values were the results from the nonparametric Wilcoxon test. Significant differences are indicated by asterisks. BAFF: B cell activating factor; APRIL: a proliferation-inducing ligand; C-ILD: chronic interstitial lung disease; RP-ILD: rapidly progressive ILD; anti-MDA5: anti-melanoma differentiation-associated gene 5.
